# Supplementary material for: The Rearing Environment and Risk for Major Depression: A Swedish National High-Risk Home-Reared and Adopted-Away Co-Sibling Control Study
Source: Atypon-hosted journal article supplement (doi:10.1176/appi.ajp.2019.19090911), 2020-04-28
Supplement: appi.ajp.2019.19090911.ds001.pdf [file appi.ajp.2019.19090911.ds001.pdf]

 


Psychiatry Online
