# Supplementary material for: The Rearing Environment and Risk for Major Depression: A Swedish National High-Risk Home-Reared and Adopted-Away Co-Sibling Control Study
Source: Atypon-hosted journal article supplement (doi:10.1176/appi.ajp.2019.19090911), 2020-04-28
Supplement: appi.ajp.2019.19090911.ds001.pdf [file appi.ajp.2019.19090911.ds001.pdf]

Data supplement for Kendler et al., The Rearing Environment and Risk for Major Depression: A Swedish National High-Risk Home-Reared and Adopted-Away Co-Sibling Control Study. *Am J Psychiatry* (doi: 10.1176/appi.ajp.2019.19090911)

TABLE S1 - Hazard Ratio (HR) for Major Depression in Matched Adopted-Away Versus Home-Reared Full- and Half-Sibships Controlling for Years of Residence in a County Covered by the Primary Care Register

| Full siblings                            | HR (95% CI)       |
|------------------------------------------|-------------------|
| Adopted vs. Reared by Biological parents | 0.79 (0.65; 0.96) |
| Parental Age at birth                    | 1.08 (1.05; 1.11) |
| Male Gender                              | 0.53 (0.42; 0.67) |
| Number of years in PCR                   | 1.06 (1.03; 1.10) |
| <b>Half siblings</b>                     |                   |
| Adopted vs. Reared by Biological parents | 0.83 (0.74; 0.93) |
| Parental Age at birth                    | 1.12 (1.10; 1.13) |
| Male Gender                              | 0.46 (0.41; 0.51) |
| High Risk Status in non-shared parent    | 1.23 (1.00; 1.51) |
| Number of years in PCR                   | 1.03 (1.02; 1.05) |

TABLE S2. Hazard Ratio (HR) for Major Depression in Matched Adopted-Away Versus Home-Reared Full- and Half-Sibships Examining Only Cases of Depression ascertained in the Hospital Discharge and Specialist Registers

| <b>Full siblings</b>                     | HR± 95% CIs       |
|------------------------------------------|-------------------|
| Adopted vs. Reared by Biological parents | 0.62 (0.44; 0.87) |
| Parental Age at birth                    | 1.11 (1.06; 1.16) |
| Male Gender                              | 0.69 (0.48; 0.99) |
|                                          |                   |
| <b>Half siblings</b>                     |                   |
| Adopted vs. Reared by Biological parents | 0.73 (0.60; 0.88) |
| Parental Age at birth                    | 1.08 (1.06; 1.10) |
| Male Gender                              | 0.47 (0.39; 0.57) |
| High Risk Status in non-shared parent    | 0.87 (0.61; 1.24) |

TABLE S3. Hazard Ratio (HR) for Major Depression in Matched Adopted-Away Versus Home-Reared Half-Sibships Pairs When Neither of the Non-Shared Parents had Major Depression

|                                          |                                             |
|------------------------------------------|---------------------------------------------|
|                                          | Only individuals without MD in other parent |
| N Adopted/Half siblings                  | 2,267/4,894                                 |
| <b>Half siblings</b>                     |                                             |
| Adopted vs. Reared by Biological parents | 0.82 (0.73; 0.93)                           |
| Parental Age at birth                    | 1.13 (1.11; 1.14)                           |
| Male Gender                              | 0.47 (0.42; 0.53)                           |
